# Supplementary material
Source: PubMed Central journal article supplement (PMC9097958)
Supplement: ehp10054.s001.acco.pdf [file ehp10054.s001.acco.pdf]

**Note to readers with disabilities:** *EHP* strives to ensure that all journal content is accessible to all readers. However, some figures and Supplemental Material published in *EHP* articles may not conform to [508 standards](#) due to the complexity of the information being presented. If you need assistance accessing journal content, please contact [ehp508@niehs.nih.gov](mailto:ehp508@niehs.nih.gov). Our staff will work with you to assess and meet your accessibility needs within 3 working days.

### **Supplemental Material**

#### **Household Air Pollution Concentrations after Liquefied Petroleum Gas Interventions in Rural Peru: Findings from a One-Year Randomized Controlled Trial Followed by a One-Year Pragmatic Crossover Trial**

Magdalena Fandiño-Del-Rio, Josiah L. Kephart, Kendra N. Williams, Timothy Shade, Temi Adekunle, Kyle Steenland, Luke P. Naeher, Lawrence H. Moulton, Gustavo F. Gonzales, Marilu Chiang, Shakir Hossen, Ryan T. Chartier, Kirsten Koehler, William Checkley, and Cardiopulmonary outcomes and Household Air Pollution (CHAP) Trial Investigators

#### **Table of Contents**

**Table S1.** CONSORT checklist of information to include when reporting a randomized trial assessing nonpharmacologic treatments.

**Table S2.** Number and percent of cumulative PM and BC samples below the detection limit in rural Peru (n=180 participants).

**Table S3.** Percent of CO direct-reading measurements below the instrument detection limit during most common cooking times of the day in rural Peru (5 AM to 9:30 AM and 6 PM to 7 PM).

**Table S4.** Household air pollution exposure summary statistics for all follow-up visits comparing maximum hourly means of control and intervention groups in rural Peru.

**Table S5.** Percent of time PM<sub>2.5</sub> personal monitors were worn by study participants during typical morning and evening cooking times in rural Peru.

**Table S6.** Time trends of pollutant concentration over time using daily means in rural Peru.

**Table S7.** Percent of daily mean samples below World Health Organization interim targets ( $\mu\text{g}/\text{m}^3$ ) for PM<sub>2.5</sub> by intervention group in rural Peru (n=180 participants).

**Table S8.** Correlation coefficients for household air pollution concentrations for different pollutants, different exposures and intraclass correlations between consecutive sampling days for year one follow-up visits 3-, 6- and 12-months in rural Peru (n=180 participants).

**Figure S1.** Screening, randomization and follow-up diagram in rural Peru.

**Figure S2.** Black carbon box plots of 48-hr mean kitchen area and personal exposure concentrations at each follow-up visit (baseline, 3-, 6-, 12-, 18-, and 24-months) for LPG stove intervention participants (LPG) and control participants (Control). During the second year (follow-up visits: 18- and 24 months) the control participants received the LPG stove intervention and vouchers for one year supply of free fuel and intervention participants stopped receiving free fuel but kept the LPG stove. Interquartile ranges of the box plots represent the 25<sup>th</sup> and the 75<sup>th</sup> percentiles of the daily means for each group; the middle line of the box represents the 50<sup>th</sup> percentile. Numeric data is provided in Table 2.

## SUPPLEMENTARY TABLES AND FIGURES

Table S1. CONSORT checklist of information to include when reporting a randomized trial assessing nonpharmacologic treatments\*

| Section/Topic Item        | Checklist item no. | CONSORT item                                                                                                                          | Extension for NPT trials                                                                                                                                                         |
|---------------------------|--------------------|---------------------------------------------------------------------------------------------------------------------------------------|----------------------------------------------------------------------------------------------------------------------------------------------------------------------------------|
| <b>Title and abstract</b> |                    |                                                                                                                                       |                                                                                                                                                                                  |
|                           | 1a                 | Identification as a randomized trial in the title                                                                                     | DONE                                                                                                                                                                             |
|                           | 1b                 | Structured summary of trial design, methods, results, and conclusions (for specific guidance see CONSORT for abstracts)               | <i>Refer to CONSORT extension for abstracts for NPT trials</i><br>DONE                                                                                                           |
| <b>Introduction</b>       |                    |                                                                                                                                       |                                                                                                                                                                                  |
| Background and objectives | 2a                 | Scientific background and explanation of rationale                                                                                    | DONE                                                                                                                                                                             |
|                           | 2b                 | Specific objectives or hypotheses                                                                                                     | DONE                                                                                                                                                                             |
| <b>Methods</b>            |                    |                                                                                                                                       |                                                                                                                                                                                  |
| Trial design              | 3a                 | Description of trial design (such as parallel, factorial) including allocation ratio                                                  | When applicable, how care providers were allocated to each trial group<br>DONE                                                                                                   |
|                           | 3b                 | Important changes to methods after trial commencement (such as eligibility criteria), with reasons                                    | DONE                                                                                                                                                                             |
| Participants              | 4a                 | Eligibility criteria for participants                                                                                                 | When applicable, eligibility criteria for centers and for <i>care providers</i><br>DONE                                                                                          |
|                           | 4b                 | Settings and locations where the data were collected                                                                                  | DONE                                                                                                                                                                             |
| Interventions†            | 5                  | The interventions for each group with sufficient details to allow replication, including how and when they were actually administered | Precise details of both the experimental treatment and comparator<br>DONE                                                                                                        |
|                           | 5a                 |                                                                                                                                       | Description of the different components of the interventions and, when applicable, description of the procedure for tailoring the interventions to individual participants. DONE |

| Section/Topic Item                 | Checklist item no. | CONSORT item                                                                                                                                                                                | Extension for NPT trials                                                                                      |
|------------------------------------|--------------------|---------------------------------------------------------------------------------------------------------------------------------------------------------------------------------------------|---------------------------------------------------------------------------------------------------------------|
|                                    | 5b                 |                                                                                                                                                                                             | Details <i>of whether and</i> how the interventions were standardized.<br>DONE                                |
|                                    | 5c.                |                                                                                                                                                                                             | Details <i>of whether and</i> how adherence of care providers to the protocol was assessed or enhanced<br>N/A |
|                                    | 5d                 |                                                                                                                                                                                             | <i>Details of whether and how adherence of participants to interventions was assessed or enhanced</i><br>DONE |
| Outcomes                           | 6a                 | Completely defined pre-specified primary and secondary outcome measures, including how and when they were assessed                                                                          | DONE                                                                                                          |
|                                    | 6b                 | Any changes to trial outcomes after the trial commenced, with reasons                                                                                                                       | DONE                                                                                                          |
| Sample size                        | 7a                 | How sample size was determined                                                                                                                                                              | When applicable, details of whether and how the clustering by care providers or centers was addressed<br>DONE |
|                                    | 7b                 | When applicable, explanation of any interim analyses and stopping guidelines                                                                                                                | N/A (no changes in trial outcomes)                                                                            |
| Randomization:                     |                    |                                                                                                                                                                                             |                                                                                                               |
| - Sequence generation              | 8a                 | Method used to generate the random allocation sequence                                                                                                                                      | DONE                                                                                                          |
|                                    | 8b                 | Type of randomization; details of any restriction (such as blocking and block size)                                                                                                         | DONE                                                                                                          |
| - Allocation concealment mechanism | 9                  | Mechanism used to implement the random allocation sequence (such as sequentially numbered containers), describing any steps taken to conceal the sequence until interventions were assigned | DONE                                                                                                          |

| Section/Topic Item                                   | Checklist item no. | CONSORT item                                                                                                                                   | Extension for NPT trials                                                                                                                                                                |
|------------------------------------------------------|--------------------|------------------------------------------------------------------------------------------------------------------------------------------------|-----------------------------------------------------------------------------------------------------------------------------------------------------------------------------------------|
| - Implementation                                     | 10                 | Who generated the random allocation sequence, who enrolled participants, and who assigned participants to interventions                        | DONE                                                                                                                                                                                    |
| Blinding                                             | 11a                | If done, who was blinded after assignment to interventions (for example, participants, care providers, those assessing outcomes) and how       | If done, who was blinded after assignment to interventions (e.g., participants, care providers, <i>those administering co-interventions</i> , those assessing outcomes) and how<br>DONE |
|                                                      | 11b                | If relevant, description of the similarity of interventions                                                                                    | N/A                                                                                                                                                                                     |
|                                                      | 11c                |                                                                                                                                                | <i>If blinding was not possible, description of any attempts to limit bias</i><br>DONE                                                                                                  |
| Statistical methods                                  | 12a                | Statistical methods used to compare groups for primary and secondary outcomes                                                                  | DONE<br>When applicable, details of whether and how the clustering by care providers or centers was addressed:<br>N/A                                                                   |
|                                                      | 12b                | Methods for additional analyses, such as subgroup analyses and adjusted analyses                                                               | N/A (no sub-analyses done)                                                                                                                                                              |
| <b>Results</b>                                       |                    |                                                                                                                                                |                                                                                                                                                                                         |
| Participant flow (a diagram is strongly recommended) | 13a                | For each group, the numbers of participants who were randomly assigned, received intended treatment, and were analyzed for the primary outcome | DONE<br>The number of care providers or centers performing the intervention in each group and the number of patients treated by each care provider or in each center: N/A               |
|                                                      | 13b                | For each group, losses and exclusions after randomization, together with reasons                                                               | DONE                                                                                                                                                                                    |
|                                                      | 13c                |                                                                                                                                                | <i>For each group, the delay between randomization and the initiation of the intervention</i> DONE                                                                                      |
|                                                      | new                |                                                                                                                                                | Details of the experimental treatment and comparator as they were implemented<br>DONE                                                                                                   |

| Section/Topic Item      | Checklist item no. | CONSORT item                                                                                                                                      | Extension for NPT trials                                                                                                                                                      |
|-------------------------|--------------------|---------------------------------------------------------------------------------------------------------------------------------------------------|-------------------------------------------------------------------------------------------------------------------------------------------------------------------------------|
| Recruitment             | 14a                | Dates defining the periods of recruitment and follow-up                                                                                           | DONE                                                                                                                                                                          |
|                         | 14b                | Why the trial ended or was stopped                                                                                                                | N/A                                                                                                                                                                           |
| Baseline data           | 15                 | A table showing baseline demographic and clinical characteristics for each group                                                                  | DONE<br>When applicable, a description of care providers (case volume, qualification, expertise, etc.) and centers (volume) in each group. N/A                                |
| Numbers analyzed        | 16                 | For each group, number of participants (denominator) included in each analysis and whether the analysis was by original assigned groups           | DONE                                                                                                                                                                          |
| Outcomes and estimation | 17a                | For each primary and secondary outcome, results for each group, and the estimated effect size and its precision (such as 95% confidence interval) | DONE                                                                                                                                                                          |
|                         | 17b                | For binary outcomes, presentation of both absolute and relative effect sizes is recommended                                                       | DONE                                                                                                                                                                          |
| Ancillary analyses      | 18                 | Results of any other analyses performed, including subgroup analyses and adjusted analyses, distinguishing pre-specified from exploratory         | N/A                                                                                                                                                                           |
| Harms                   | 19                 | All important harms or unintended effects in each group (for specific guidance see CONSORT for harms)                                             | DONE                                                                                                                                                                          |
| <b>Discussion</b>       |                    |                                                                                                                                                   |                                                                                                                                                                               |
| Limitations             | 20                 | Trial limitations, addressing sources of potential bias, imprecision, and, if relevant, multiplicity of analyses                                  | DONE<br>In addition, take into account the choice of the comparator, lack of or partial blinding, and unequal expertise of care providers or centers in each group            |
| Generalizability        | 21                 | Generalizability (external validity, applicability) of the trial findings                                                                         | DONE<br>Generalizability (external validity) of the trial findings according to the intervention, comparators, patients, and care providers and centers involved in the trial |

| Section/Topic Item       | Checklist item no. | CONSORT item                                                                                                  | Extension for NPT trials |
|--------------------------|--------------------|---------------------------------------------------------------------------------------------------------------|--------------------------|
| Interpretation           | 22                 | Interpretation consistent with results, balancing benefits and harms, and considering other relevant evidence | DONE                     |
| <b>Other information</b> |                    |                                                                                                               |                          |
| Registration             | 23                 | Registration number and name of trial registry                                                                | DONE                     |
| Protocol                 | 24                 | Where the full trial protocol can be accessed, if available                                                   | DONE                     |
| Funding                  | 25                 | Sources of funding and other support (such as supply of drugs), role of funders                               | DONE                     |

*\*Additions or modifications to the 2010 CONSORT checklist. CONSORT = Consolidated Standards of Reporting Trials*

*†The items 5, 5a, 5b, 5c, 5d are consistent with the Template for Intervention Description and Replication (TIDieR) checklist*

Table S2. Number and percent of cumulative PM and BC samples below the detection limit in rural Peru (n=180 participants)

| Visit <sup>a</sup>               | Control group - Biomass cookstove |         | Intervention group - LPG stove |         |
|----------------------------------|-----------------------------------|---------|--------------------------------|---------|
|                                  | N                                 | Percent | N                              | Percent |
| <b>Kitchen PM<sub>2.5</sub></b>  |                                   |         |                                |         |
| Baseline                         | 2                                 | 2       | 6                              | 7       |
| 3                                | 13                                | 14      | 64                             | 71      |
| 6                                | 13                                | 14      | 52                             | 58      |
| 12                               | 8                                 | 9       | 31                             | 35      |
| 18                               | 33                                | 37      | 41                             | 47      |
| 24                               | 40                                | 47      | 40                             | 47      |
| <b>Personal PM<sub>2.5</sub></b> |                                   |         |                                |         |
| Baseline                         | 16                                | 18      | 18                             | 20      |
| 3                                | 28                                | 31      | 59                             | 66      |
| 6                                | 19                                | 21      | 39                             | 43      |
| 12                               | 16                                | 18      | 37                             | 42      |
| 18                               | 53                                | 59      | 51                             | 58      |
| 24                               | 49                                | 57      | 48                             | 56      |
| <b>Kitchen BC</b>                |                                   |         |                                |         |
| Baseline                         | 3                                 | 3       | 3                              | 3       |
| 3                                | 11                                | 12      | 76                             | 84      |
| 6                                | 13                                | 14      | 67                             | 74      |
| 12                               | 6                                 | 7       | 66                             | 74      |
| 18                               | 79                                | 88      | 48                             | 55      |
| 24                               | 81                                | 94      | 51                             | 59      |
| <b>Personal BC</b>               |                                   |         |                                |         |
| Baseline                         | 15                                | 17      | 10                             | 11      |
| 3                                | 29                                | 32      | 85                             | 94      |
| 6                                | 27                                | 30      | 83                             | 92      |
| 12                               | 18                                | 20      | 78                             | 89      |
| 18                               | 85                                | 94      | 60                             | 68      |
| 24                               | 81                                | 94      | 66                             | 77      |

a. Visits: Baseline and 3-, 6-, 12-, 18-, and 24-months. PM<sub>2.5</sub>: fine particulate matter; BC: black carbon. The limit of detection for PM<sub>2.5</sub> was 20 µg/filter for the first six months of the study and 9.8 µg/filter for the remainder of 2.5 years of the study. The LOD for BC was 1.4 µg/filter.



Table S3. Percent of CO direct-reading measurements below the instrument detection limit during most common cooking times of the day in rural Peru (5 AM to 9:30 AM and 6 PM to 7 PM)

| Visit <sup>a</sup> | Control group - Biomass cookstove |      |      |        |          |          | Intervention group - LPG stove |      |      |        |          |          |
|--------------------|-----------------------------------|------|------|--------|----------|----------|--------------------------------|------|------|--------|----------|----------|
|                    | N                                 | Mean | SD   | Median | 25th pct | 75th pct | N                              | Mean | SD   | Median | 25th pct | 75th pct |
| <b>Kitchen CO</b>  |                                   |      |      |        |          |          |                                |      |      |        |          |          |
| Baseline           | 85                                | 30.6 | 23.2 | 25.9   | 12.4     | 43.4     | 87                             | 31.9 | 21.5 | 30.2   | 16.7     | 40.8     |
| 3                  | 84                                | 33.9 | 24.5 | 30.1   | 14.4     | 47.5     | 83                             | 65.4 | 29.2 | 73.1   | 45.7     | 90.7     |
| 6                  | 86                                | 33.3 | 22.9 | 29.8   | 19.1     | 45.4     | 82                             | 57.8 | 27.4 | 62.9   | 36.9     | 80.2     |
| 12                 | 86                                | 33.4 | 23.3 | 30.9   | 14.8     | 46.7     | 78                             | 56.3 | 29.7 | 61.5   | 31.6     | 80.7     |
| 18                 | 84                                | 60.2 | 29.9 | 64.3   | 38.7     | 83.0     | 80                             | 47.3 | 31.2 | 45.9   | 17.1     | 76.0     |
| 24                 | 81                                | 62.3 | 23.8 | 61.6   | 46.5     | 82.1     | 79                             | 44.7 | 28.8 | 38.2   | 23.1     | 69.9     |
| <b>Personal CO</b> |                                   |      |      |        |          |          |                                |      |      |        |          |          |
| Baseline           | 81                                | 55.7 | 27.4 | 63.0   | 39.3     | 74.7     | 80                             | 57.0 | 23.4 | 58.7   | 38.9     | 74.0     |
| 3                  | 80                                | 64.2 | 25.2 | 69.5   | 48.3     | 83.5     | 80                             | 75.3 | 24.6 | 85.1   | 62.5     | 95.0     |
| 6                  | 84                                | 55.0 | 27.4 | 61.6   | 31.7     | 80.1     | 80                             | 84.4 | 17.4 | 89.8   | 80.5     | 95.3     |
| 12                 | 83                                | 61.5 | 22.8 | 62.3   | 43.4     | 79.2     | 83                             | 81.3 | 19.8 | 90.4   | 70.4     | 98.3     |
| 18                 | 79                                | 81.9 | 20.4 | 90.2   | 70.3     | 97.3     | 83                             | 75.0 | 23.0 | 83.4   | 70.5     | 1.5      |
| 24                 | 74                                | 82.1 | 19.5 | 87.7   | 76.4     | 97.1     | 77                             | 75.7 | 24.0 | 85.0   | 69.5     | 1.6      |

a. Visits: Baseline and 3-, 6-, 12-, 18-, and 24-months. CO: carbon monoxide; SD: standard deviation; pct: percentile; N: represents non missing samples in each timepoint; the limit of detection for the direct-reading CO monitors: 1 ppm.

Table S4. Household air pollution exposure summary statistics for all follow-up visits comparing maximum hourly means of control and intervention groups in rural Peru <sup>a</sup>

| Follow-up visit (months)<br><sup>a</sup> | Control group - Biomass cookstove |              |                                               |            | Intervention group - LPG stove |               |                                                  |            | p-value<br><sup>c</sup> |
|------------------------------------------|-----------------------------------|--------------|-----------------------------------------------|------------|--------------------------------|---------------|--------------------------------------------------|------------|-------------------------|
|                                          | N <sup>b</sup>                    | Mean (SD)    | Median (25 <sup>th</sup> , 75 <sup>th</sup> ) | GM (GDS)   | N <sup>b</sup>                 | Mean (SD)     | Median (25 <sup>th</sup> , 75 <sup>th</sup> pct) | GM (GDS)   |                         |
| <b>Kitchen PM<sub>2.5</sub></b>          |                                   |              |                                               |            |                                |               |                                                  |            |                         |
| Baseline                                 | 89                                | 10010 (6830) | 9750 (3890, 14080)                            | 7280 (3)   | 89                             | 9410 (6280)   | 8920 (4590, 13390)                               | 6710 (3)   | 0.587                   |
| 3                                        | 88                                | 8470 (6940)  | 6660 (2840, 12790)                            | 5230 (3)   | 90                             | 770 (851)     | 538 (233, 911)                                   | 486 (3)    | <0.001                  |
| 6                                        | 89                                | 9740 (8830)  | 7830 (3590, 13920)                            | 5570 (4)   | 90                             | 588 (719)     | 331 (187, 734)                                   | 346 (3)    | <0.001                  |
| 12                                       | 89                                | 10600 (8430) | 9040 (4040, 14650)                            | 6810 (3)   | 89                             | 867 (1640)    | 262 (79, 818)                                    | 252 (5)    | <0.001                  |
| 18                                       | 90                                | 1253 (3099)  | 311 (101, 695)                                | 324 (5)    | 88                             | 3717 (4869)   | 839 (273, 5814)                                  | 1149 (5)   | <0.001                  |
| 24                                       | 86                                | 782 (2177)   | 189 (109, 448)                                | 228 (4)    | 86                             | 4738 (10144)  | 814 (358, 6356)                                  | 1246 (6)   | <0.001                  |
| <b>Personal PM<sub>2.5</sub></b>         |                                   |              |                                               |            |                                |               |                                                  |            |                         |
| Baseline                                 | 90                                | 2080 (2570)  | 1390 (820, 2090)                              | 1330 (3)   | 89                             | 1950 (1790)   | 1500 (760, 2340)                                 | 1370 (2)   | 0.813                   |
| 3                                        | 88                                | 1680 (2620)  | 970 (460, 1880)                               | 920 (3)    | 90                             | 280 (366)     | 150 (84, 313)                                    | 163 (3)    | <0.001                  |
| 6                                        | 90                                | 1940 (2810)  | 1180 (490, 2300)                              | 980 (4)    | 89                             | 365 (897)     | 140 (59, 299)                                    | 138 (4)    | <0.001                  |
| 12                                       | 90                                | 1900 (2120)  | 1180 (610, 2530)                              | 1120 (3)   | 88                             | 291 (544)     | 92 (43, 325)                                     | 120 (4)    | <0.001                  |
| 18                                       | 90                                | 246 (376)    | 105 (50, 249)                                 | 112 (3)    | 88                             | 763 (1485)    | 265 (106, 724)                                   | 285 (4)    | <0.001                  |
| 24                                       | 86                                | 265 (458)    | 85 (43, 257)                                  | 112 (3)    | 85                             | 623 (781)     | 316 (135, 745)                                   | 293 (4)    | <0.001                  |
| <b>Kitchen CO</b>                        |                                   |              |                                               |            |                                |               |                                                  |            |                         |
| Baseline                                 | 85                                | 306 (168)    | 311 (195, 412)                                | 248 (2)    | 87                             | 296 (156)     | 306 (165, 403)                                   | 223 (3)    | 0.465                   |
| 3                                        | 84                                | 308 (182)    | 340 (160, 415)                                | 218 (3)    | 82                             | 37.1 (40.2)   | 20.7 (5.3, 57)                                   | 15.9 (4.8) | <0.001                  |
| 6                                        | 86                                | 328 (189)    | 360 (210, 426)                                | 238 (3)    | 82                             | 47.3 (51.5)   | 31.3 (14.6, 55.1)                                | 26.3 (3.5) | <0.001                  |
| 12                                       | 86                                | 331 (193)    | 360 (183, 439)                                | 238 (3)    | 78                             | 72.8 (116.1)  | 46.6 (18.1, 79.1)                                | 32.7 (4.4) | <0.001                  |
| 18                                       | 84                                | 59.1 (97.9)  | 39.9 (8.5, 72.9)                              | 24.2 (4.8) | 80                             | 165.3 (162.5) | 87.1 (25.6, 335.3)                               | 68.6 (5.4) | <0.001                  |
| 24                                       | 81                                | 64.6 (86)    | 40.9 (9.5, 75.9)                              | 27.1 (4.7) | 79                             | 171.6 (169.7) | 66.3 (36.3, 337.4)                               | 80.2 (4.3) | <0.001                  |
| <b>Personal CO</b>                       |                                   |              |                                               |            |                                |               |                                                  |            |                         |
| Baseline                                 | 81                                | 61.6 (78.2)  | 33.1 (17.9, 65.7)                             | 32 (3.4)   | 80                             | 85.1 (107)    | 38.2 (19.5, 84.1)                                | 43.7 (3.3) | 0.104                   |
| 3                                        | 80                                | 60.3 (72.9)  | 37.2 (18.2, 73)                               | 32.1 (3.5) | 80                             | 16.2 (17)     | 9.3 (4.6, 23.1)                                  | 9.4 (3.1)  | <0.001                  |
| 6                                        | 84                                | 64.8 (79.7)  | 42.6 (22.2, 76.5)                             | 37.3 (3.1) | 80                             | 11.9 (15.3)   | 6.1 (3.2, 12.8)                                  | 6.6 (3)    | <0.001                  |
| 12                                       | 81                                | 83.3 (96.7)  | 42.5 (22.1, 109)                              | 43.8 (3.4) | 81                             | 19.2 (26)     | 9.6 (3.6, 26.7)                                  | 9.1 (3.7)  | <0.001                  |
| 18                                       | 78                                | 18.1 (22.7)  | 7.4 (2.9, 29.8)                               | 8.3 (3.9)  | 83                             | 43.1 (74.4)   | 13.3 (3.5, 45.9)                                 | 13.1 (5.4) | 0.060                   |
| 24                                       | 74                                | 18.4 (36.2)  | 7.8 (2.9, 17.9)                               | 7.4 (3.8)  | 77                             | 43.7 (72.8)   | 14.8 (5, 45.8)                                   | 14.8 (4.9) | 0.005                   |

a. During the second year (follow-up visits:18- and 24 months) the control participants received the LPG stove intervention and vouchers for one year supply of free fuel and intervention participants stopped receiving free fuel but kept the LPG stove.

*b.* N: represents non missing samples in each timepoint; GM: geometric mean; GSD: geometric standard deviation; PM<sub>2.5</sub>: fine particulate matter; CO: carbon monoxide; BC: black carbon.

*c.* P-values obtained using Student t-test on the log transformed exposure concentrations comparing intervention and control groups. BC consisted of time weighted integrated samples therefore hourly maximums were not evaluated for this pollutant. Samples < LOD were replaced by LOD/sqrt(2): 7 and 1  $\mu\text{g}$  for PM<sub>2.5</sub> and BC gravimetric integrated samples, respectively; and 0.7 ppm for direct reading CO measurements

Table S5. Percent of time PM<sub>2.5</sub> personal monitors were worn by study participants during typical morning and evening cooking times in rural Peru

| Visit <sup>a</sup>    | N    | During typical morning cooking times day 1 |        |          |          |         | During typical evening cooking times day 1 |        |          |          |         | During typical morning cooking times day 2 |        |          |          |         | During typical evening cooking times day 2 |        |          |          |         |
|-----------------------|------|--------------------------------------------|--------|----------|----------|---------|--------------------------------------------|--------|----------|----------|---------|--------------------------------------------|--------|----------|----------|---------|--------------------------------------------|--------|----------|----------|---------|
|                       |      | Mean                                       | Median | 25th pct | 75th pct | p-value | Mean                                       | Median | 25th pct | 75th pct | p-value | Mean                                       | Median | 25th pct | 75th pct | p-value | Mean                                       | Median | 25th pct | 75th pct | p-value |
| Baseline Intervention | 89   | 86.5                                       | 100.0  | 84.8     | 100      |         | 67.5                                       | 95.1   | 35.5     | 100      |         | 56.2                                       | 63.0   | 36.3     | 80       |         | 62.8                                       | 91.8   | 13.2     | 100      |         |
| Baseline Control      | 90   | 87.5                                       | 100.0  | 95.4     | 100      | 0.56    | 68.2                                       | 88.7   | 25.7     | 100      | 0.57    | 63.6                                       | 70.6   | 47.4     | 86       | 0.07    | 70.6                                       | 100.0  | 25.6     | 100      | 0.16    |
| Month 3 Intervention  | 90   | 77.5                                       | 98.2   | 59.5     | 100      |         | 60.2                                       | 91.2   | 12.7     | 100      |         | 47.5                                       | 52.9   | 13.9     | 72       |         | 61.9                                       | 85.5   | 12.5     | 100      |         |
| Month 3 Control       | 88   | 80.3                                       | 97.6   | 70.3     | 100      | 0.69    | 61.5                                       | 88.3   | 8.5      | 100      | 0.62    | 50.3                                       | 55.7   | 17.9     | 76       | 0.51    | 63.1                                       | 88.4   | 15.6     | 100      | 0.53    |
| Month 6 Intervention  | 89   | 84.6                                       | 100.0  | 79.8     | 100      |         | 59.8                                       | 88.1   | 14.1     | 100      |         | 46.5                                       | 57.4   | 9.3      | 74       |         | 60.3                                       | 84.2   | 10.4     | 100      |         |
| Month 6 Control       | 90   | 79.9                                       | 97.2   | 68.1     | 100      | 0.19    | 55.3                                       | 62.5   | 7.5      | 100      | 0.47    | 48.5                                       | 57.3   | 11.1     | 77       | 0.55    | 56.0                                       | 67.2   | 5.0      | 100      | 0.34    |
| Month 12 Intervention | 88   | 73.3                                       | 94.4   | 43.6     | 100      |         | 58.8                                       | 77.3   | 6.3      | 100      |         | 43.4                                       | 53.1   | 5.9      | 73       |         | 60.7                                       | 85.1   | 5.5      | 100      |         |
| Month 12 Control      | 90   | 85.3                                       | 98.7   | 79.9     | 100      | 0.07    | 59.0                                       | 77.5   | 1.7      | 100      | 0.998   | 50.0                                       | 65.6   | 13.8     | 76       | 0.13    | 60.7                                       | 87.0   | 10.5     | 100      | 0.60    |
| Month 18 Intervention | 87   | 73.7                                       | 99.2   | 43.6     | 100      |         | 56.9                                       | 68.3   | 12.5     | 100      |         | 41.2                                       | 44.1   | 8.3      | 67       |         | 45.2                                       | 20.9   | 0.3      | 100      |         |
| Month 18 Control      | 90   | 83.3                                       | 100.0  | 69.5     | 100      | 0.30    | 58.3                                       | 65.5   | 14.3     | 100      | 0.760   | 49.6                                       | 64.3   | 13.9     | 79       | 0.06    | 61.6                                       | 79.4   | 19.2     | 100      | 0.02    |
| Month 24 Intervention | 85   | 76.2                                       | 100.0  | 55.6     | 100      |         | 56.3                                       | 70.9   | 3.1      | 100      |         | 43.6                                       | 46.5   | 14.6     | 66       |         | 52.9                                       | 57.4   | 0.0      | 100      |         |
| Month 24 Control      | 85   | 81.0                                       | 100.0  | 75.7     | 100      | 0.70    | 55.7                                       | 66.3   | 10.3     | 100      | 0.57    | 52.2                                       | 64.5   | 14.1     | 78       | 0.03    | 53.1                                       | 50.7   | 8.5      | 100      | 0.51    |
| All samples           | 1061 | 81                                         | 100    | 70       | 100      |         | 60                                         | 83     | 13       | 100      |         | 49                                         | 58     | 15       | 76       |         | 59                                         | 80     | 11       | 100      |         |

a. pct: percentile; N: represents non missing samples in each timepoint; PM<sub>2.5</sub>: fine particulate matter. P-values obtained using the Wilcoxon rank-sum test to compare the intervention group and control group in each follow-up visit. Typical cooking times defined as: morning: 4 AM to 9 AM and evening: 5 PM to 7 PM.

Table S6. Time trends of pollutant concentration over time using daily means in rural Peru

| Exposure <sup>a</sup>      | Year 1  |         |              |         | Year 2  |         |              |         |
|----------------------------|---------|---------|--------------|---------|---------|---------|--------------|---------|
|                            | Control |         | Intervention |         | Control |         | Intervention |         |
|                            | Slope   | p-value | Slope        | p-value | Slope   | p-value | Slope        | p-value |
| Kitchen PM <sub>2.5</sub>  | 1.022   | 0.09    | 0.896        | <0.001  | 0.950   | 0.03    | 0.996        | 0.89    |
| Personal PM <sub>2.5</sub> | 1.023   | 0.11    | 0.967        | 0.004   | 1.001   | 0.97    | 0.994        | 0.74    |
| Kitchen BC                 | 1.014   | 0.31    | 0.877        | <0.001  | 0.980   | 0.23    | 0.964        | 0.20    |
| Personal BC                | 1.025   | 0.08    | 0.965        | <0.001  | 1.003   | 0.73    | 0.971        | 0.13    |
| Kitchen CO                 | 1.003   | 0.82    | 1.056        | <0.001  | 0.996   | 0.88    | 1.036        | 0.20    |
| Personal CO                | 1.011   | 0.47    | 1.003        | 0.84    | 0.997   | 0.92    | 0.990        | 0.66    |

a. Generalized estimating equation models were used using the log transformed pollutant concentrations and study time visit (in months) as a continuous variable. The slopes indicate the time trends (e.g. if slope <1, pollutant concentrations decreased over time) evaluated within intervention group. PM<sub>2.5</sub>: fine particulate matter; CO: carbon monoxide; BC: black carbon. Daily mean metric used is defined as the mean of the two consecutive 24-hr average concentrations, where available.

Table S7. Percent of daily mean samples below World Health Organization interim targets ( $\mu\text{g}/\text{m}^3$ ) for  $\text{PM}_{2.5}$  by intervention group in rural Peru (n=180 participants)

| Visit <sup>a</sup>                           | Control group - Biomass cookstove |       |     |     | Intervention group - LPG stove |       |     |     |
|----------------------------------------------|-----------------------------------|-------|-----|-----|--------------------------------|-------|-----|-----|
|                                              | <35                               | <37.5 | <50 | <75 | <35                            | <37.5 | <50 | <75 |
| <b>Kitchen <math>\text{PM}_{2.5}</math></b>  |                                   |       |     |     |                                |       |     |     |
| Baseline                                     | 2%                                | 2%    | 2%  | 3%  | 1%                             | 1%    | 1%  | 3%  |
| 3                                            | 1%                                | 1%    | 1%  | 6%  | 22%                            | 23%   | 29% | 61% |
| 6                                            | 0%                                | 0%    | 1%  | 13% | 37%                            | 38%   | 46% | 89% |
| 12                                           | 0%                                | 0%    | 1%  | 10% | 70%                            | 72%   | 79% | 86% |
| 18                                           | 76%                               | 79%   | 85% | 90% | 16%                            | 16%   | 17% | 50% |
| 24                                           | 92%                               | 92%   | 92% | 92% | 16%                            | 16%   | 16% | 44% |
| <b>Personal <math>\text{PM}_{2.5}</math></b> |                                   |       |     |     |                                |       |     |     |
| Baseline                                     | 19%                               | 20%   | 31% | 57% | 24%                            | 26%   | 36% | 49% |
| 3                                            | 38%                               | 38%   | 44% | 69% | 89%                            | 89%   | 94% | 98% |
| 6                                            | 30%                               | 31%   | 43% | 61% | 78%                            | 80%   | 87% | 91% |
| 12                                           | 26%                               | 27%   | 38% | 58% | 80%                            | 82%   | 87% | 93% |
| 18                                           | 91%                               | 92%   | 95% | 99% | 74%                            | 76%   | 81% | 87% |
| 24                                           | 83%                               | 88%   | 96% | 96% | 71%                            | 75%   | 82% | 86% |

a. Visits: Baseline and 3-, 6-, 12-, 18-, and 24-months of follow up;  $\text{PM}_{2.5}$ : fine particulate matter. Daily mean metric used is defined as the mean of the two consecutive 24-hr average concentrations, where available.

Table S8. Correlation coefficients for household air pollution concentrations for different pollutants, different exposures and intraclass correlations between consecutive sampling days for year one follow-up visits 3-, 6- and 12-months in rural Peru (n=180 participants)

| Variables compared <sup>a</sup>                                                | Spearman correlation coefficient   | Number of pairs |
|--------------------------------------------------------------------------------|------------------------------------|-----------------|
| <b>Comparing pollutants</b>                                                    |                                    |                 |
| Kitchen CO vs PM <sub>2.5</sub> control group                                  | 0.90                               | 241             |
| Kitchen CO vs PM <sub>2.5</sub> LPG intervention group                         | 0.05                               | 223             |
| Kitchen TWA PM <sub>2.5</sub> vs BC control group                              | 0.76                               | 265             |
| Kitchen TWA PM <sub>2.5</sub> vs BC LPG intervention group                     | 0.80                               | 267             |
| Personal CO vs PM <sub>2.5</sub> control group                                 | 0.36                               | 216             |
| Personal CO vs PM <sub>2.5</sub> LPG intervention group                        | 0.15                               | 210             |
| Personal TWA PM <sub>2.5</sub> vs BC control group                             | 0.78                               | 267             |
| Personal TWA PM <sub>2.5</sub> vs BC LPG intervention group                    | 0.35                               | 266             |
| <b>Comparing kitchen area and personal exposures</b>                           |                                    |                 |
| Kitchen PM <sub>2.5</sub> vs Personal PM <sub>2.5</sub> control group          | 0.48                               | 248             |
| Kitchen PM <sub>2.5</sub> vs Personal PM <sub>2.5</sub> LPG intervention group | 0.36                               | 245             |
| Kitchen BC vs Personal BC control group                                        | 0.50                               | 248             |
| Kitchen BC vs Personal BC LPG intervention group                               | 0.71                               | 245             |
| Kitchen CO vs Personal CO control group                                        | 0.32                               | 224             |
| Kitchen CO vs Personal CO LPG intervention group                               | 0.26                               | 207             |
| <b>Comparing consecutive days: day 1 vs day 2</b>                              |                                    |                 |
| Variables compared                                                             | Intraclass correlation coefficient | Number of pairs |
| Kitchen CO control group                                                       | 0.77                               | 253             |
| Kitchen CO LPG intervention group                                              | 0.84                               | 232             |
| Kitchen PM <sub>2.5</sub> control group                                        | 0.54                               | 259             |
| Kitchen PM <sub>2.5</sub> LPG intervention group                               | 0.57                               | 259             |
| Personal CO control group                                                      | 0.67                               | 234             |
| Personal CO LPG intervention group                                             | 0.76                               | 231             |
| Personal PM <sub>2.5</sub> control group                                       | 0.36                               | 254             |
| Personal PM <sub>2.5</sub> LPG intervention group                              | 0.50                               | 253             |

a. PM<sub>2.5</sub>: fine particulate matter; CO: carbon monoxide; BC: black carbon. Intraclass correlation coefficients (ICCs) represent the ratio of the between-consecutive-day variance to the total sample variance of measurements in a one-way random-effects model.

Figure S1. Screening, randomization and follow-up diagram in rural Peru

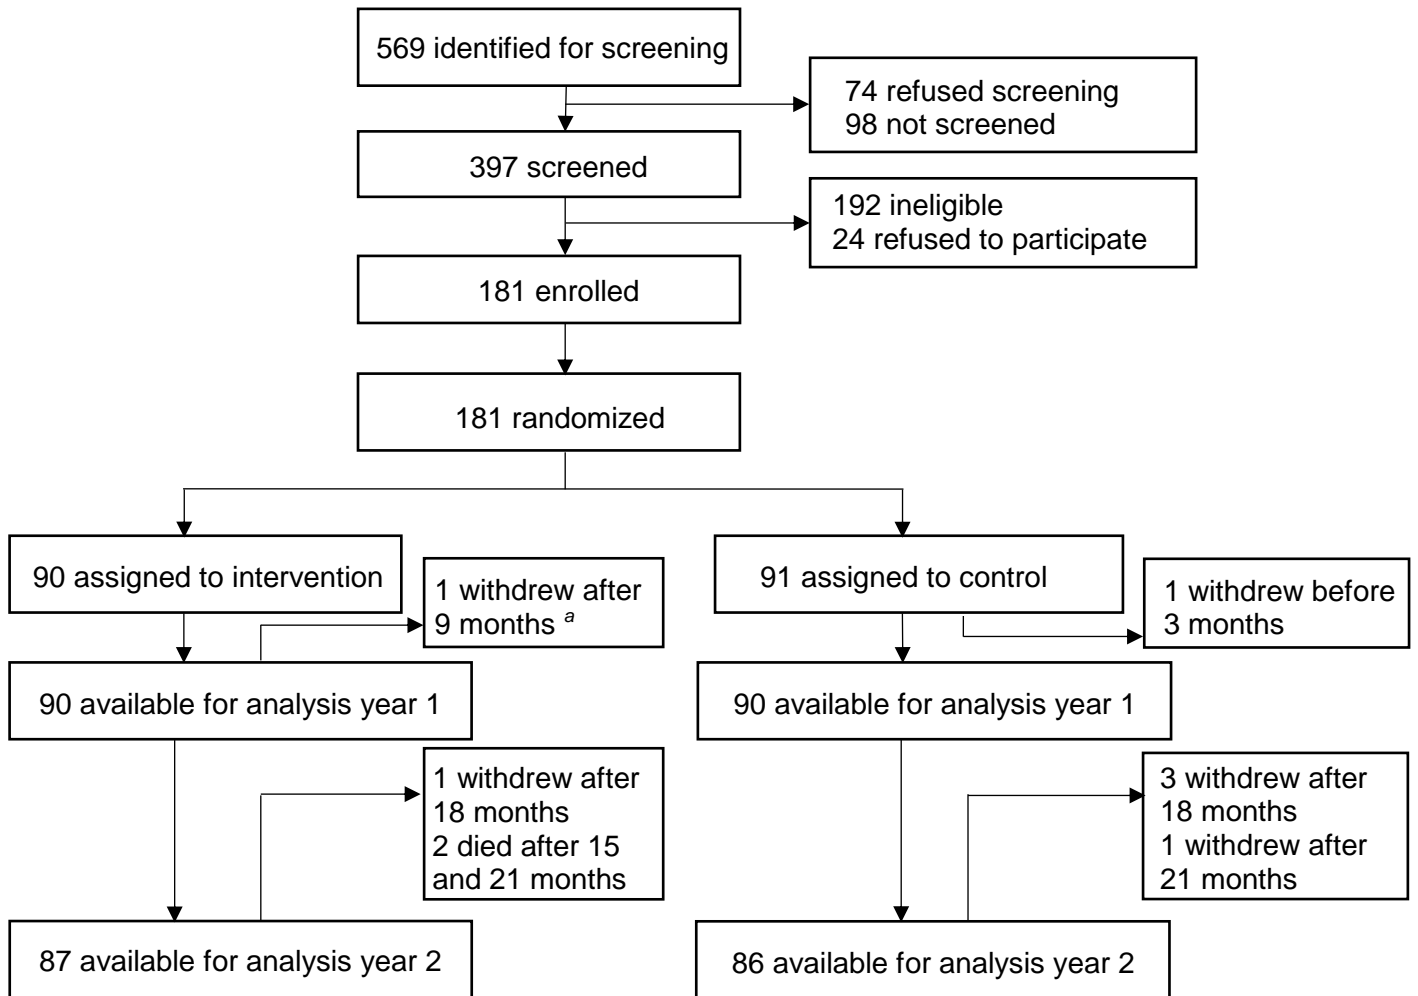

a. Data from baseline, and months-3 and -6 follow up visits was collected for the participant that withdrew and was included in the analysis, only data from month-12 follow up was missing.



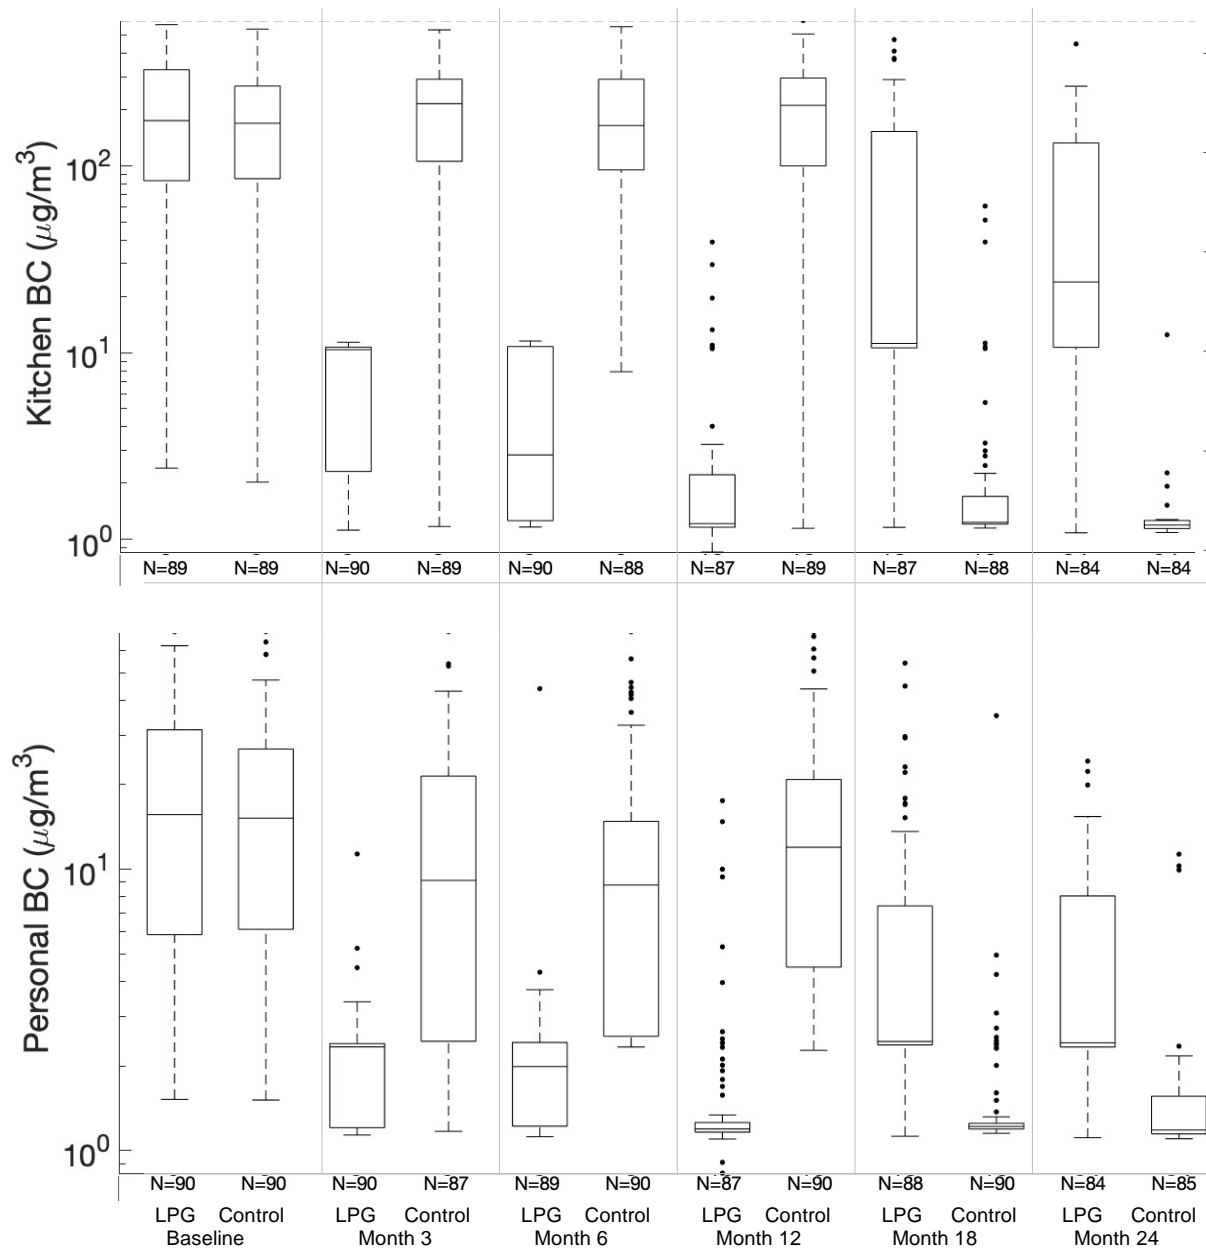

Figure S2. Black carbon box plots of 48-hr mean kitchen area and personal exposure concentrations at each follow-up visit (baseline, 3-, 6-, 12-, 18-, and 24-months) for LPG stove intervention participants (LPG) and control participants (Control). During the second year (follow-up visits:18- and 24 months) the control participants received the LPG stove intervention and vouchers for one year supply of free fuel and intervention participants stopped receiving free fuel but kept the LPG stove. Interquartile ranges of the box plots represent the 25<sup>th</sup> and the 75<sup>th</sup> percentiles of the daily means for each group; the middle line of the box represents the 50<sup>th</sup> percentile. Numeric data is provided in Table 2.
